# Supplementary material
Source: MDPI journal article supplement (https://www.mdpi.com/2075-1702/10/12/1207)
Supplement: s1 [file s1]

## Supplementary

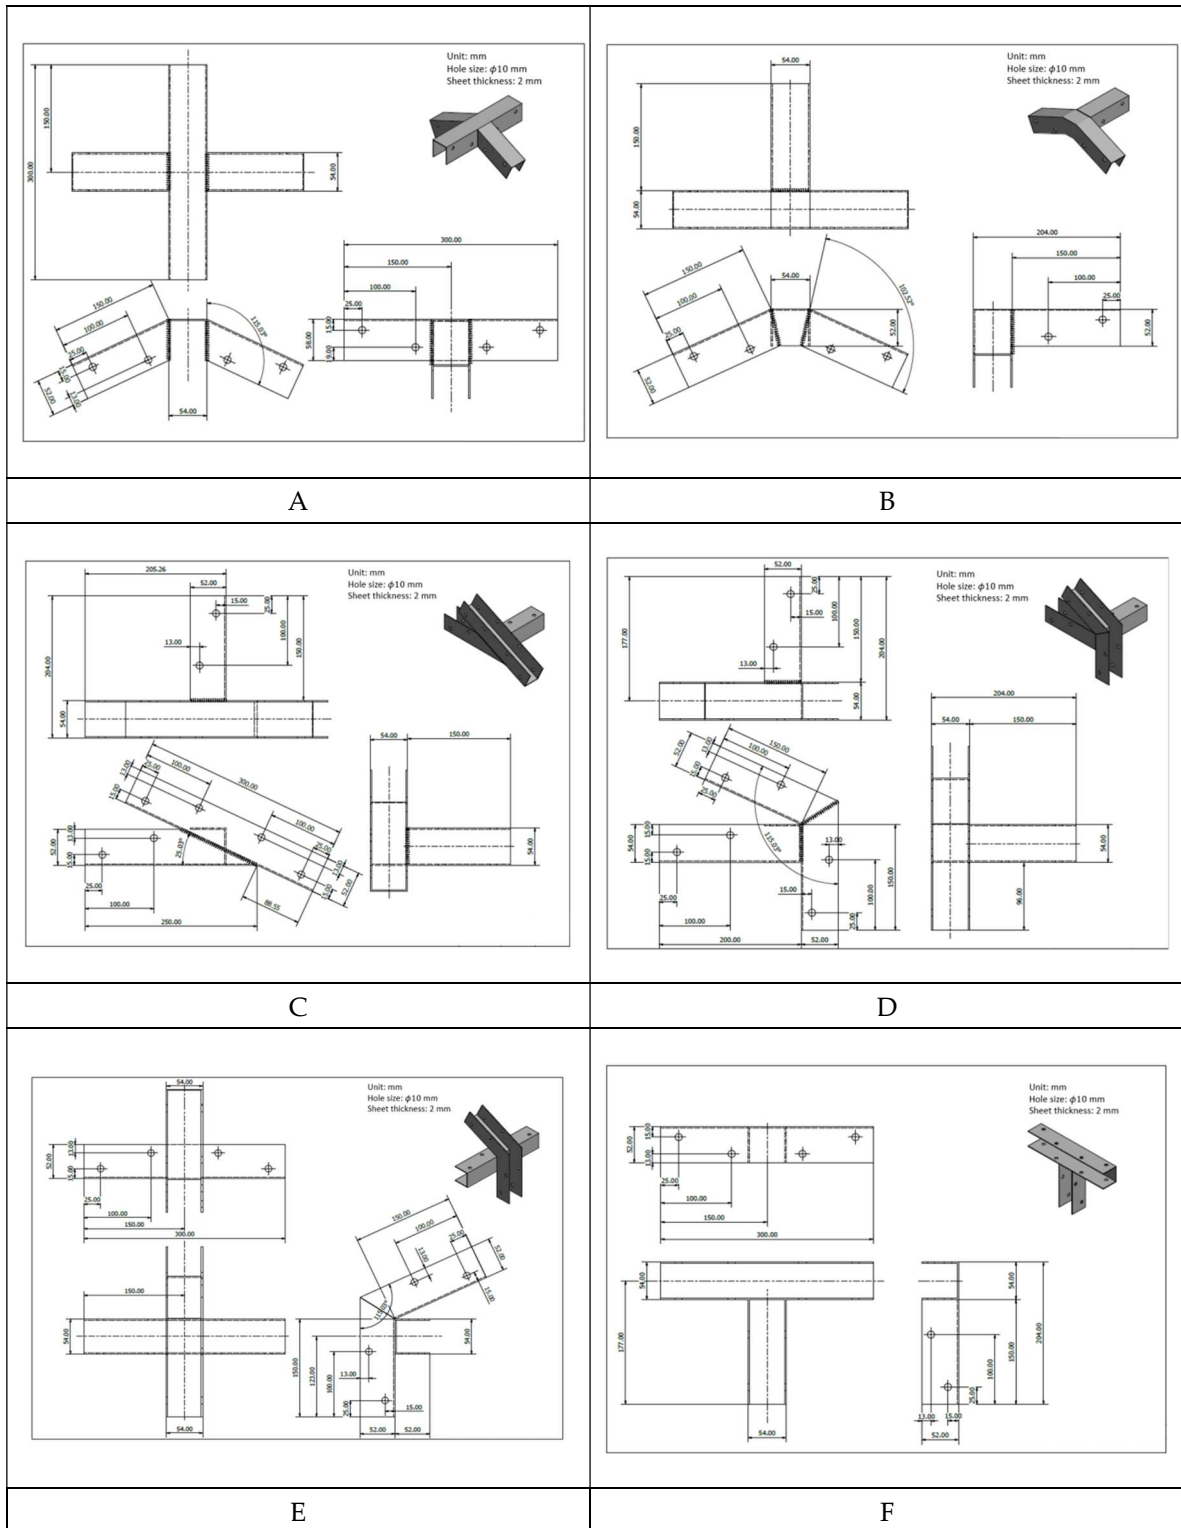

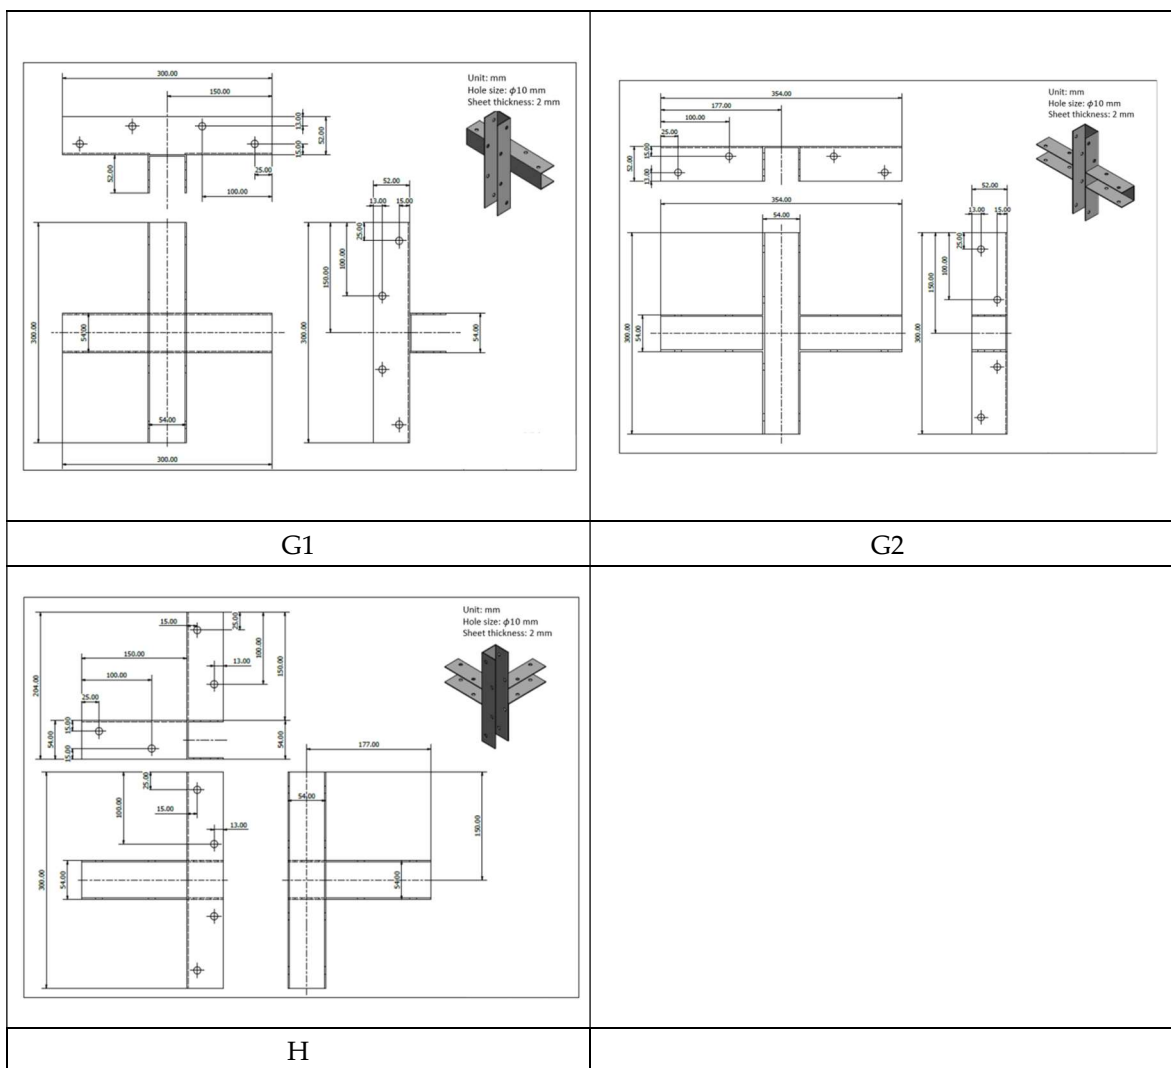

**Figure S1.** The dimension information of fastener A to I.

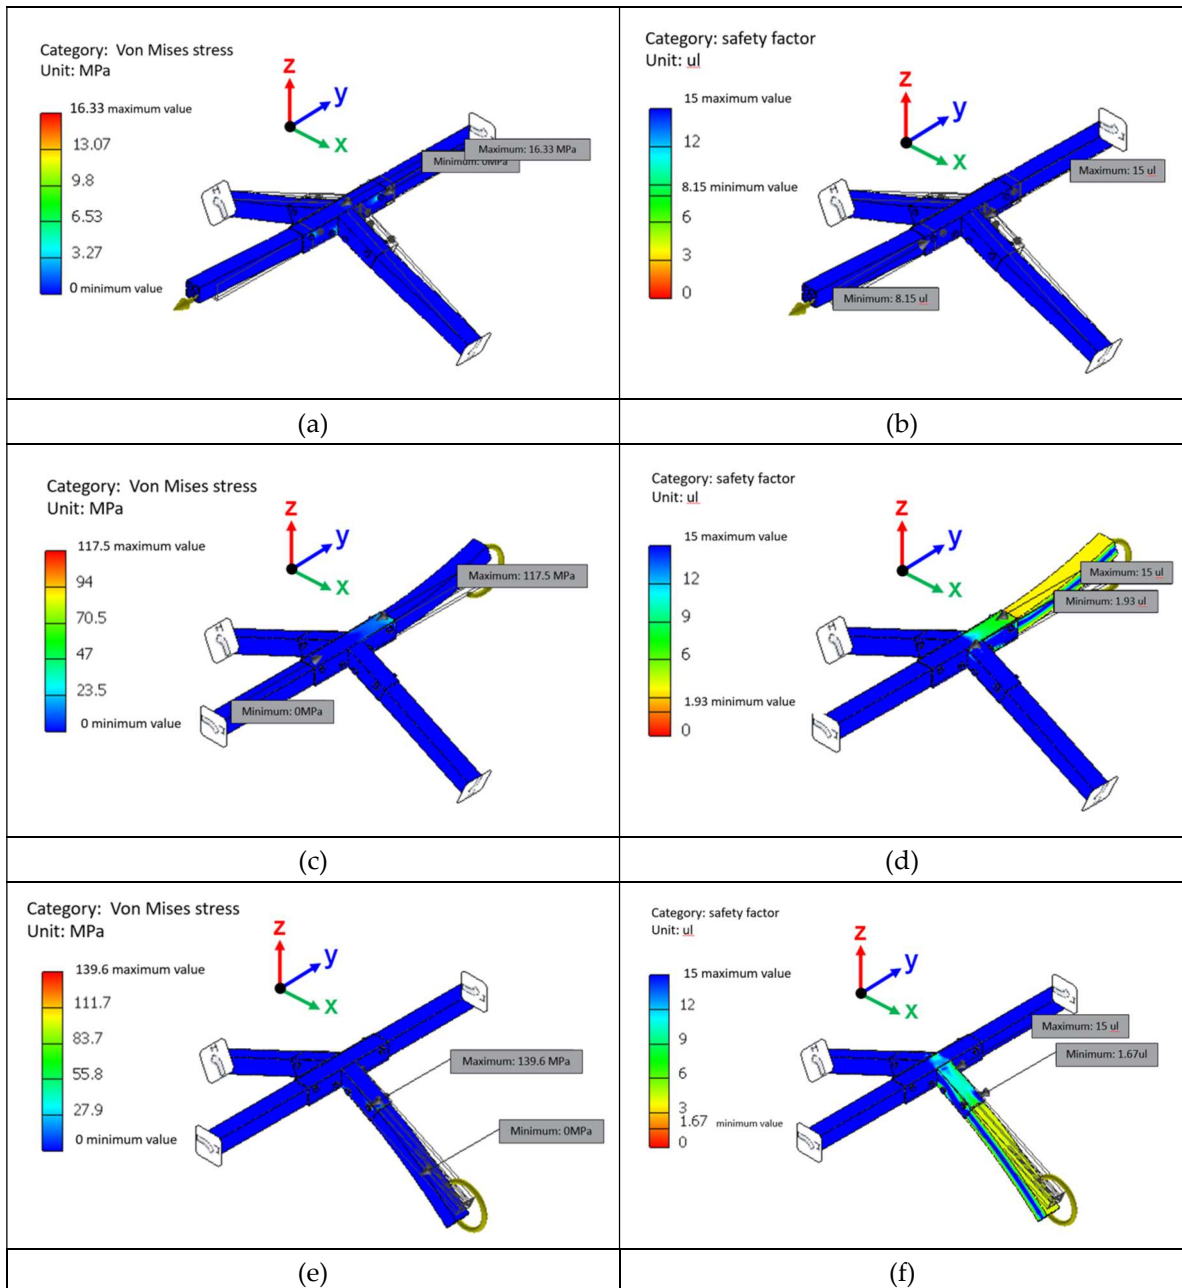

**Figure S2.** Fastener A (a) von Mises stress and (b) safety factor under axial tension (c) von Mises stress and (d) safety factor under X-axis bending moment (e) von Mises stress and (f) safety factor under Y-axis bending moment

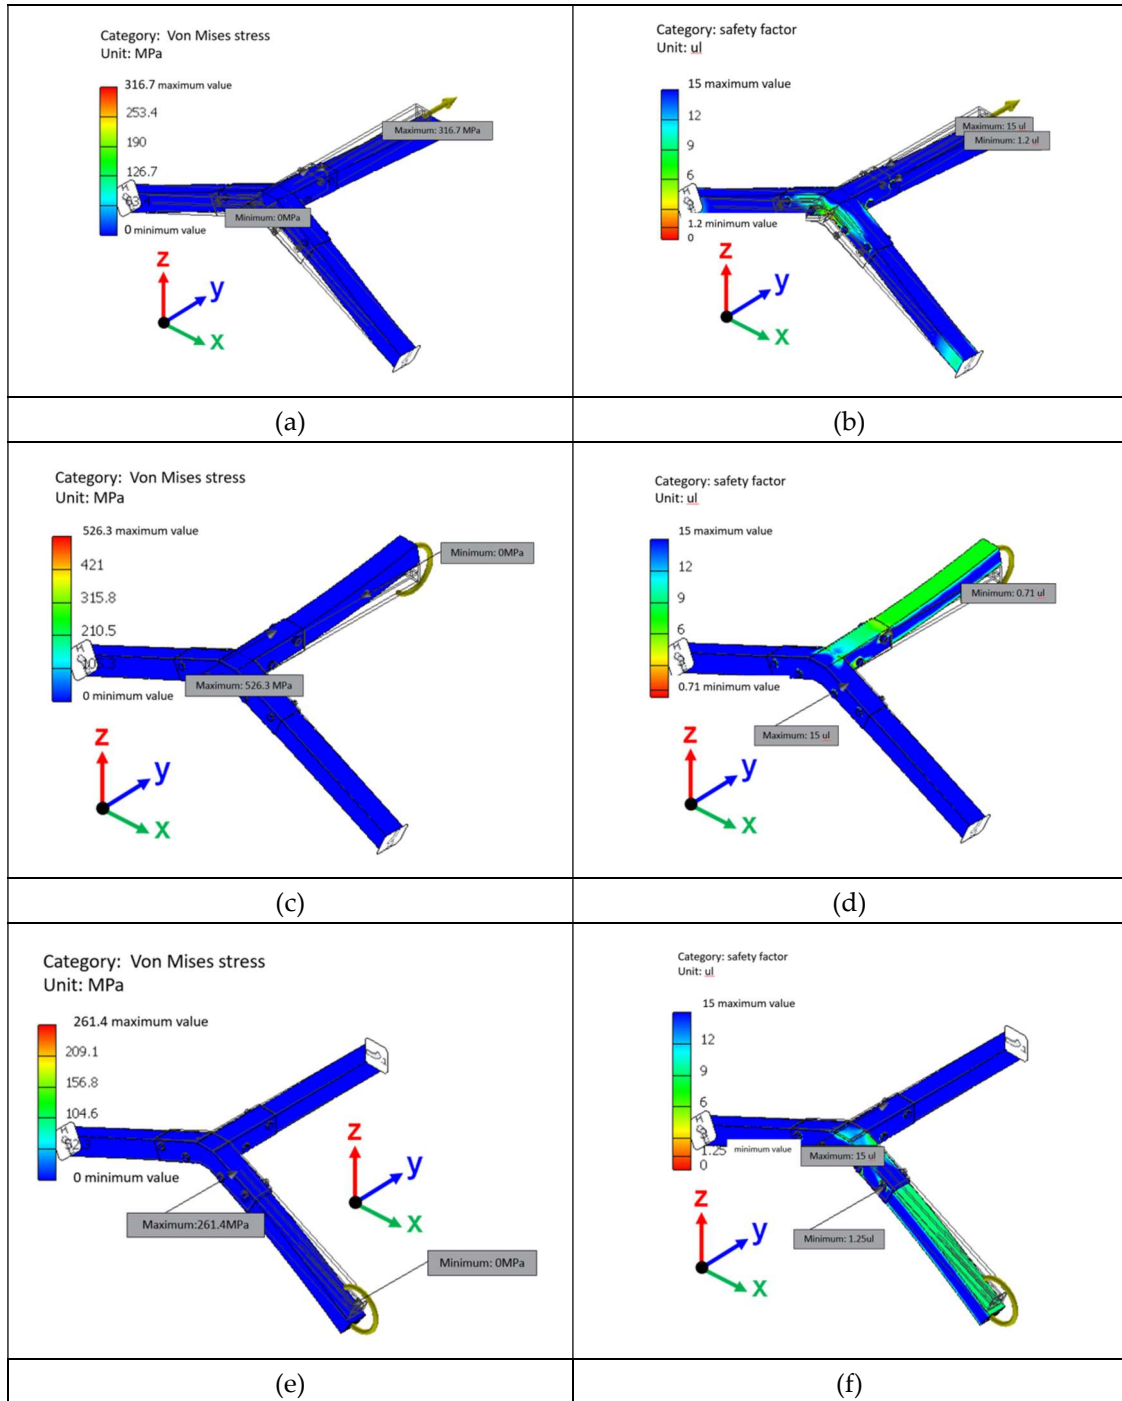

**Figure S3.** Fastener B (a) von Mises stress and (b) safety factor under axial tension (c) von Mises stress and (d) safety factor under X-axis bending moent (e) von Mises stress and (f) safety factor under Y-axis bending moment

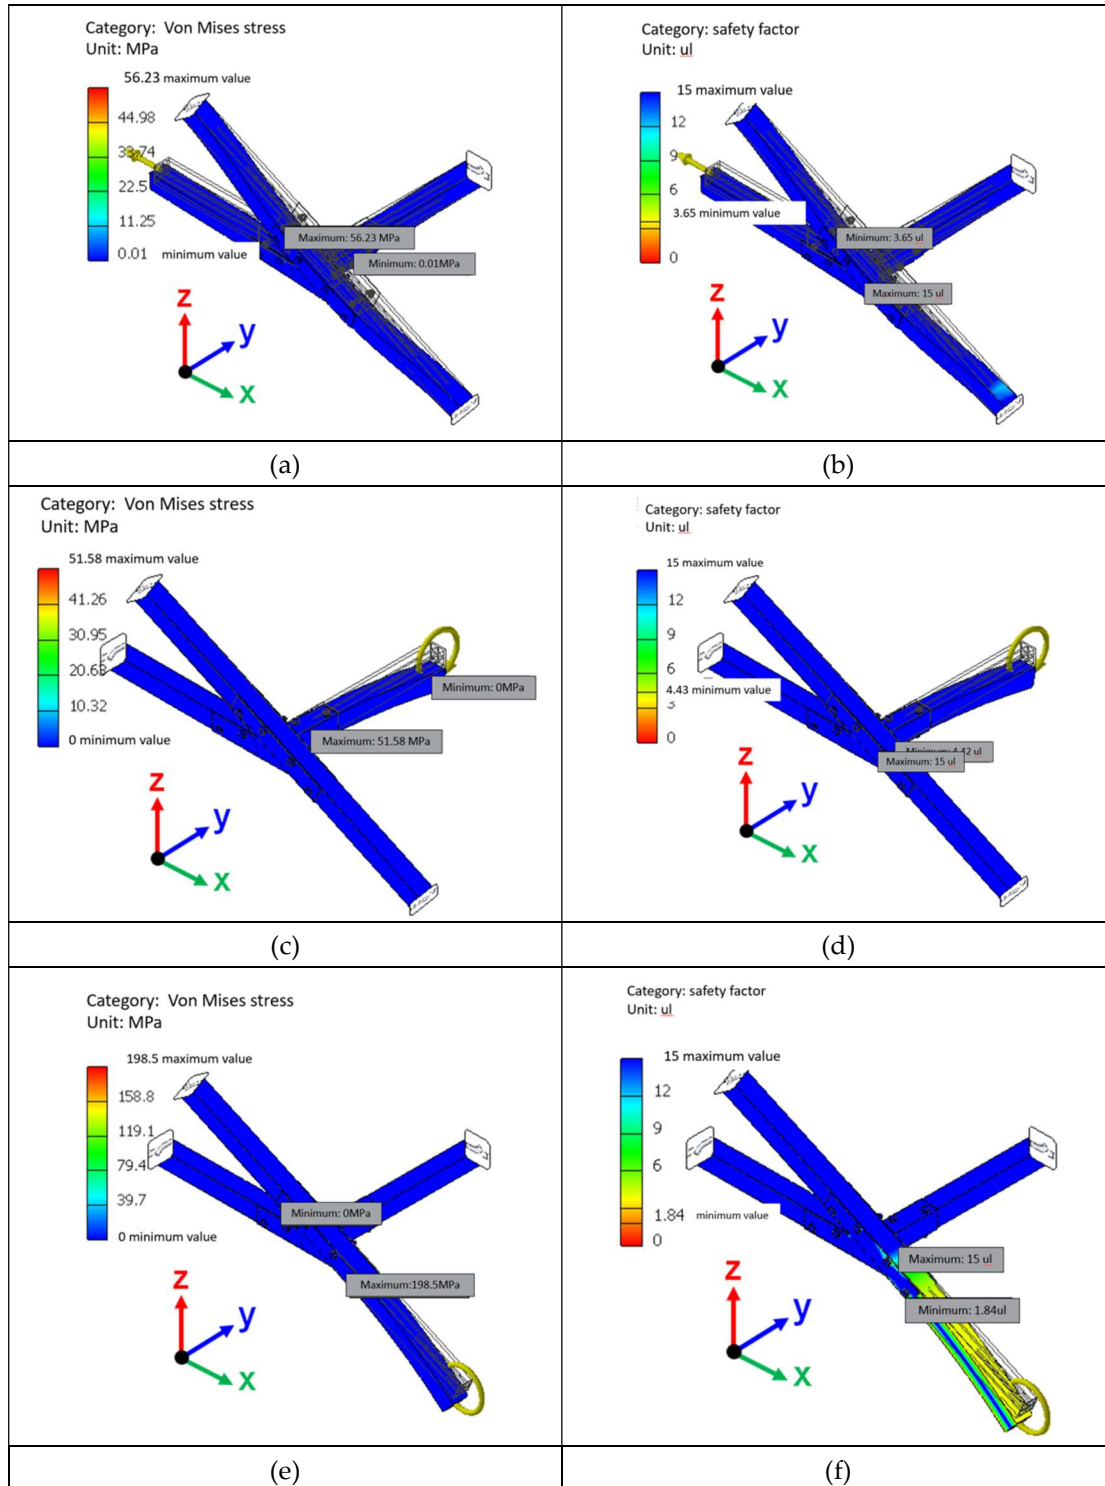

**Figure S4.** Fastener C (a) von Mises stress and (b) safety factor under axial tension (c) von Mises stress and (d) safety factor under X-axis bending moment (e) von Mises stress and (f) safety factor under Y-axis bending moment

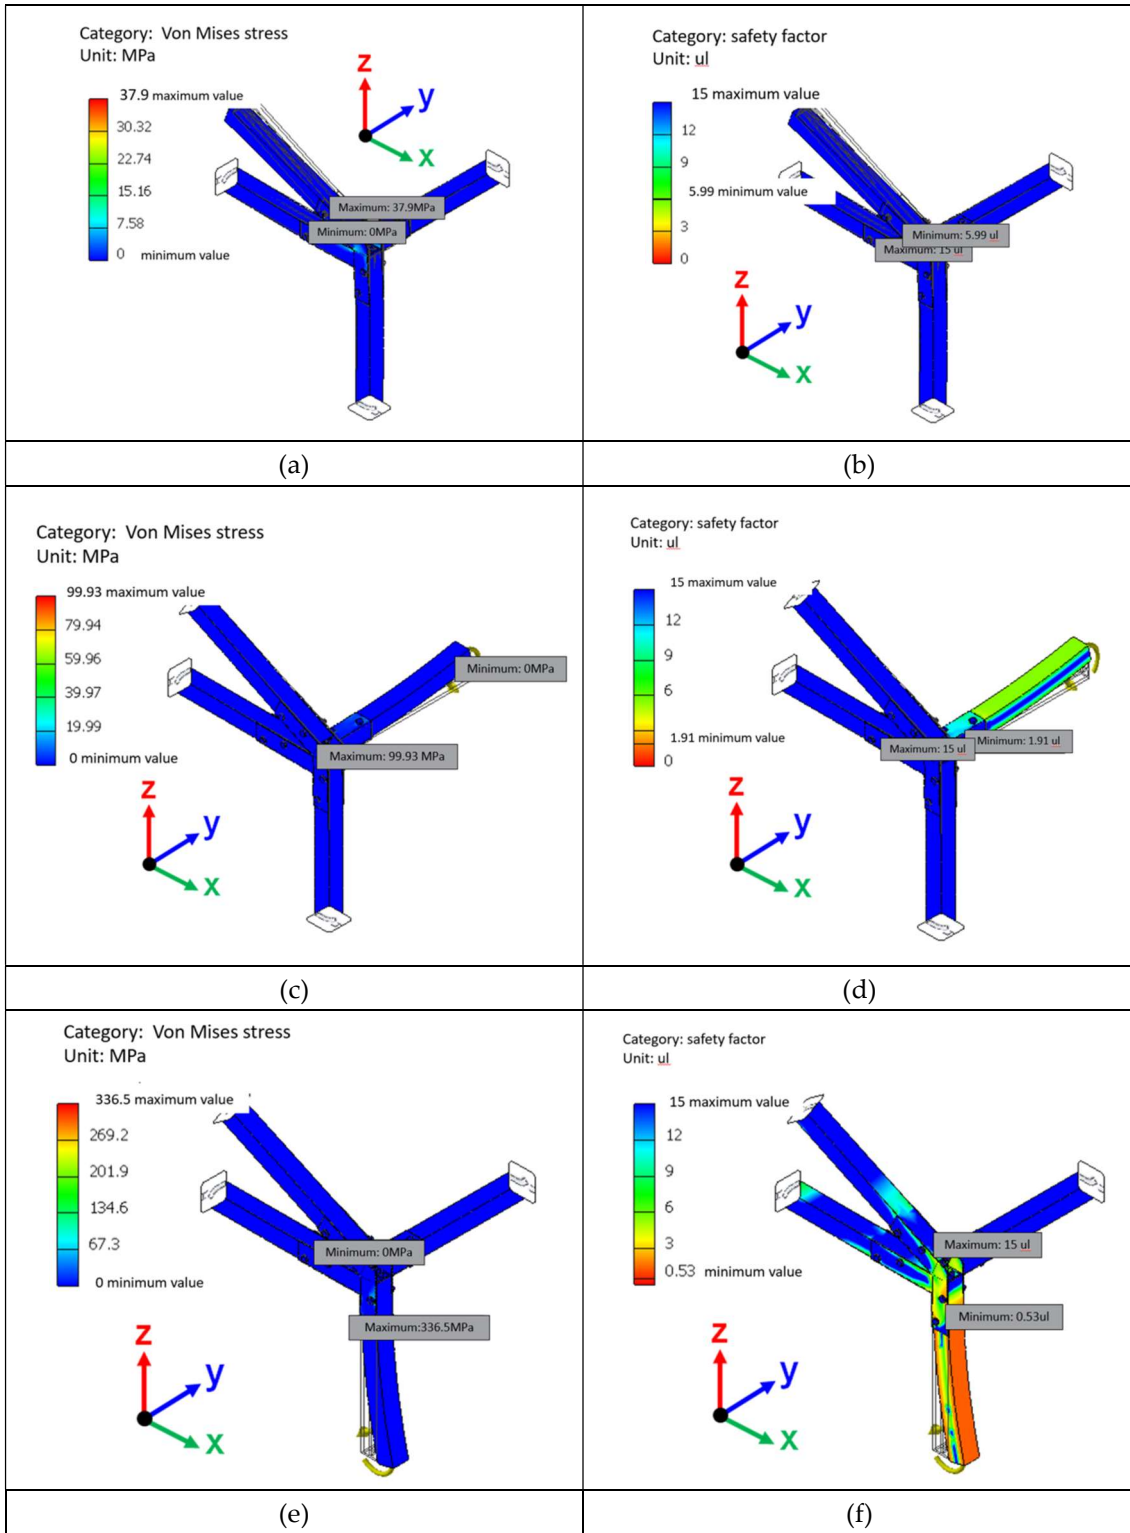

**Figure S5.** Fastener D (a) von Mises stress and (b) safety factor under axial tension (c) von Mises stress and (d) safety factor under X-axis bending moment (e) von Mises stress and (f) safety factor under Y-axis bending moment

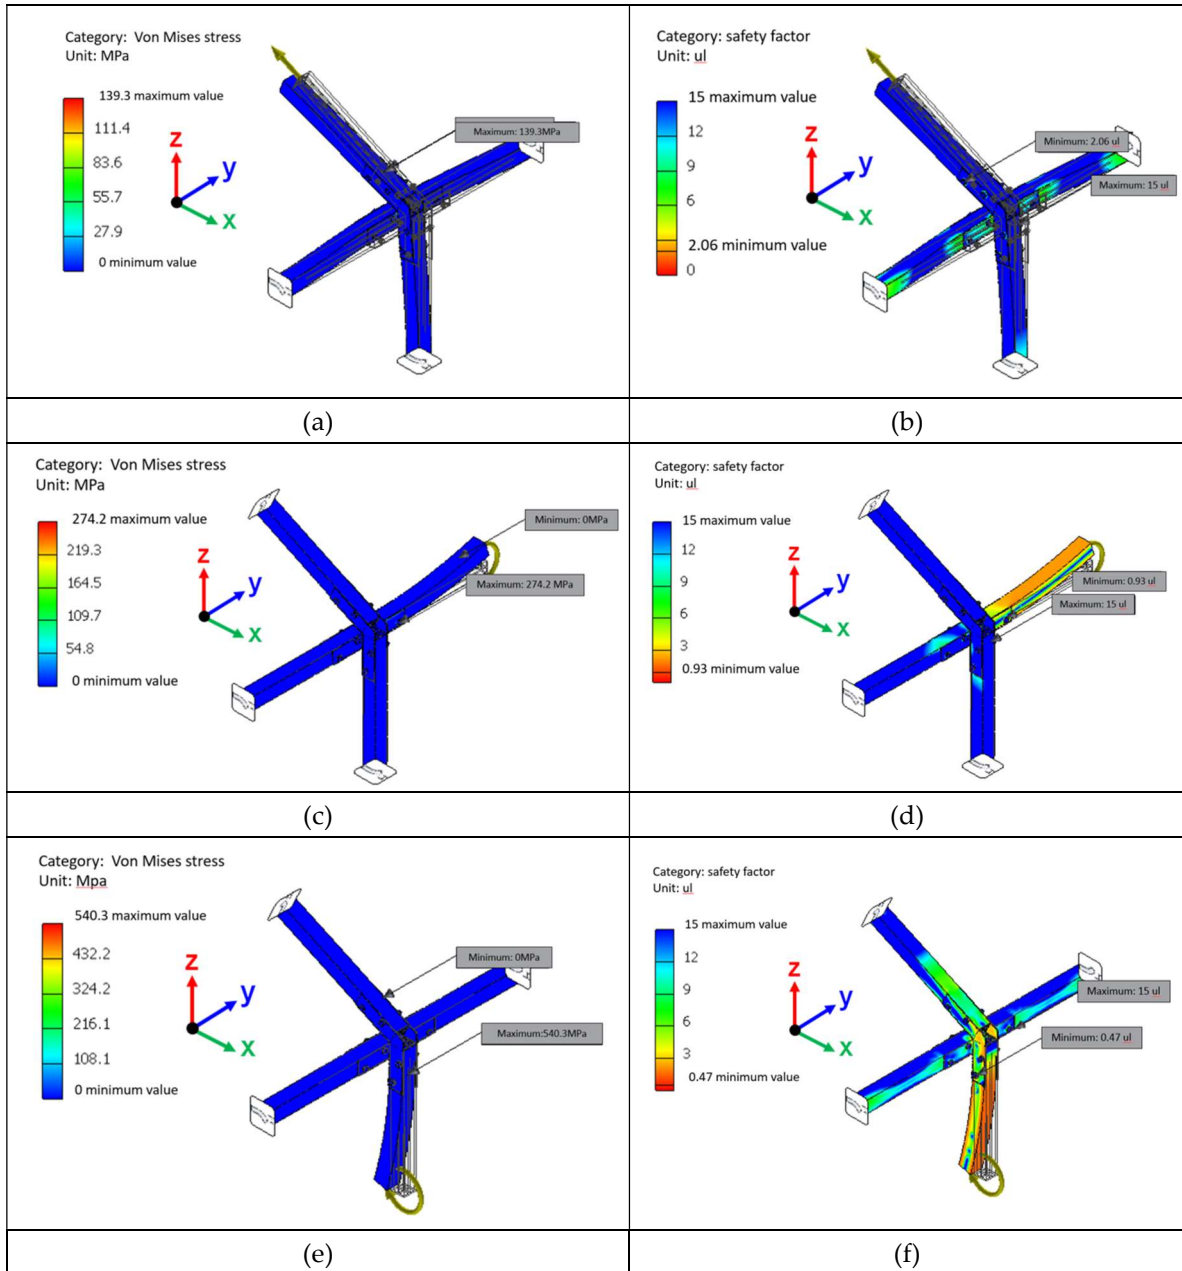

**Figure S6.** Fastener E (a) von Mises stress and (b) safety factor under axial tension (c) von Mises stress and (d) safety factor under X-axis bending moment (e) von Mises stress and (f) safety factor under Y-axis bending moment



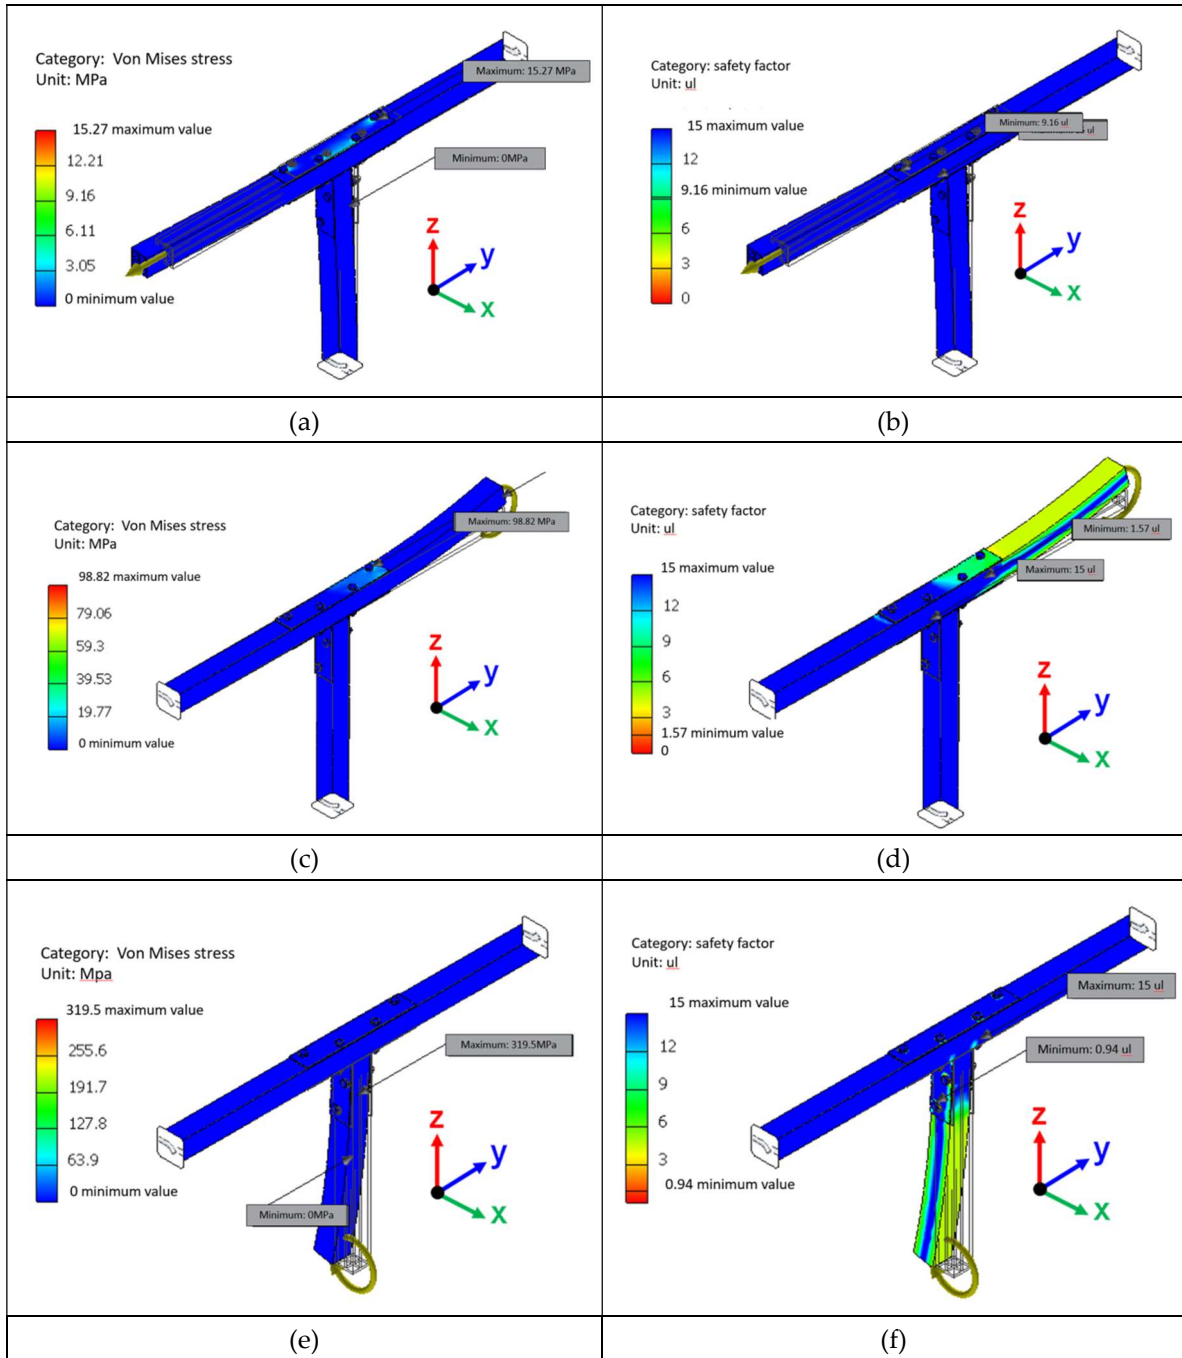

**Figure S7.** Fastener F (a) von Mises stress and (b) safety factor under axial tension (c) von Mises stress and (d) safety factor under X-axis bending moment (e) von Mises stress and (f) safety factor under Y-axis bending moment



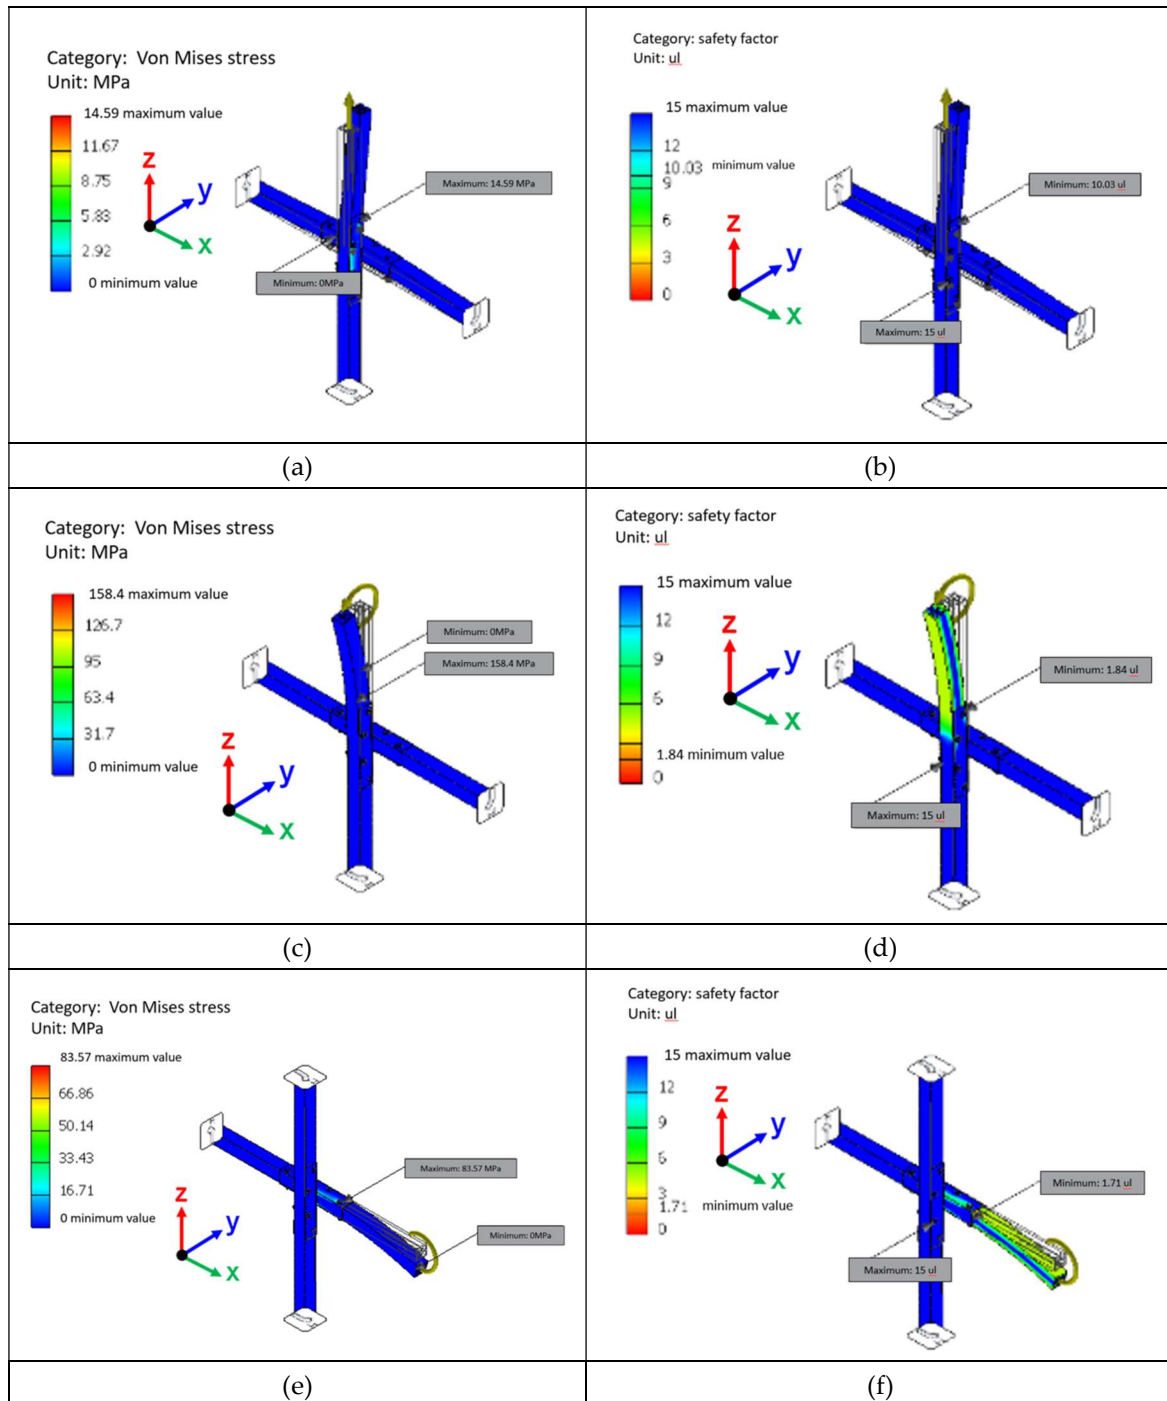

**Figure S8.** Fastener G1 (a) von Mises stress and (b) safety factor under axial tension (c) von Mises stress and (d) safety factor under X-axis bending moment (e) von Mises stress and (f) safety factor under Y-axis bending moment

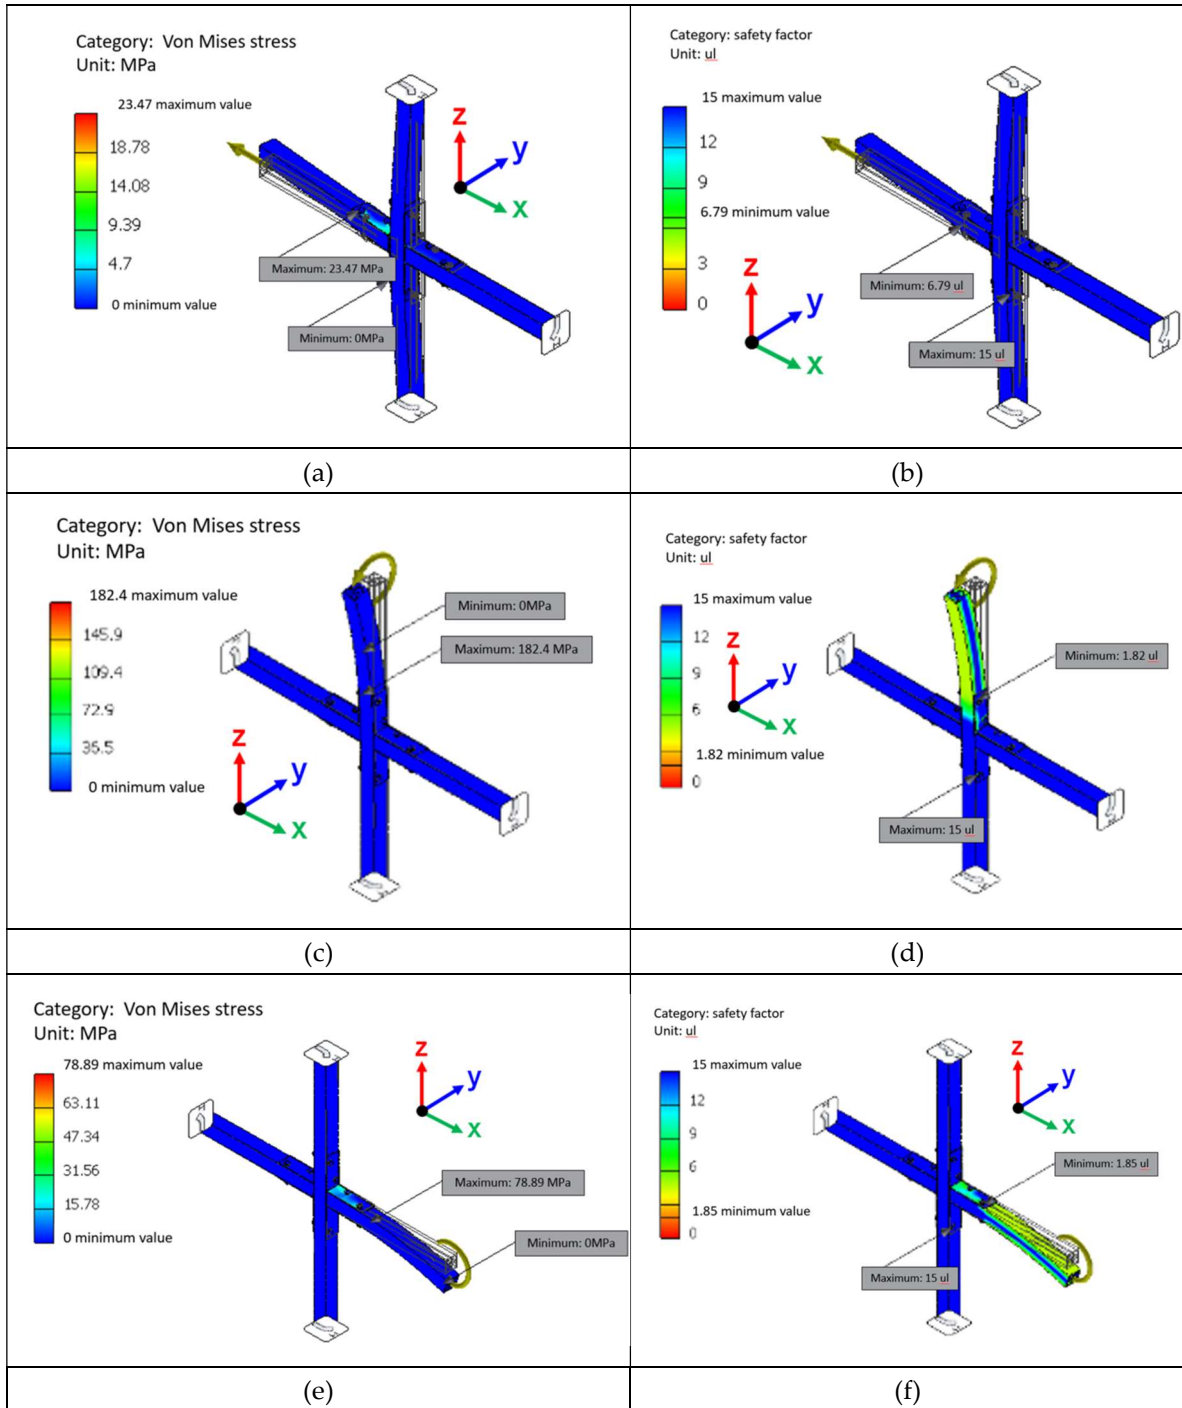

**Figure S9.** Fastener G2 (a) von Mises stress and (b) safety factor under axial tension (c) von Mises stress and (d) safety factor under X-axis bending moment (e) von Mises stress and (f) safety factor under Y-axis bending moment

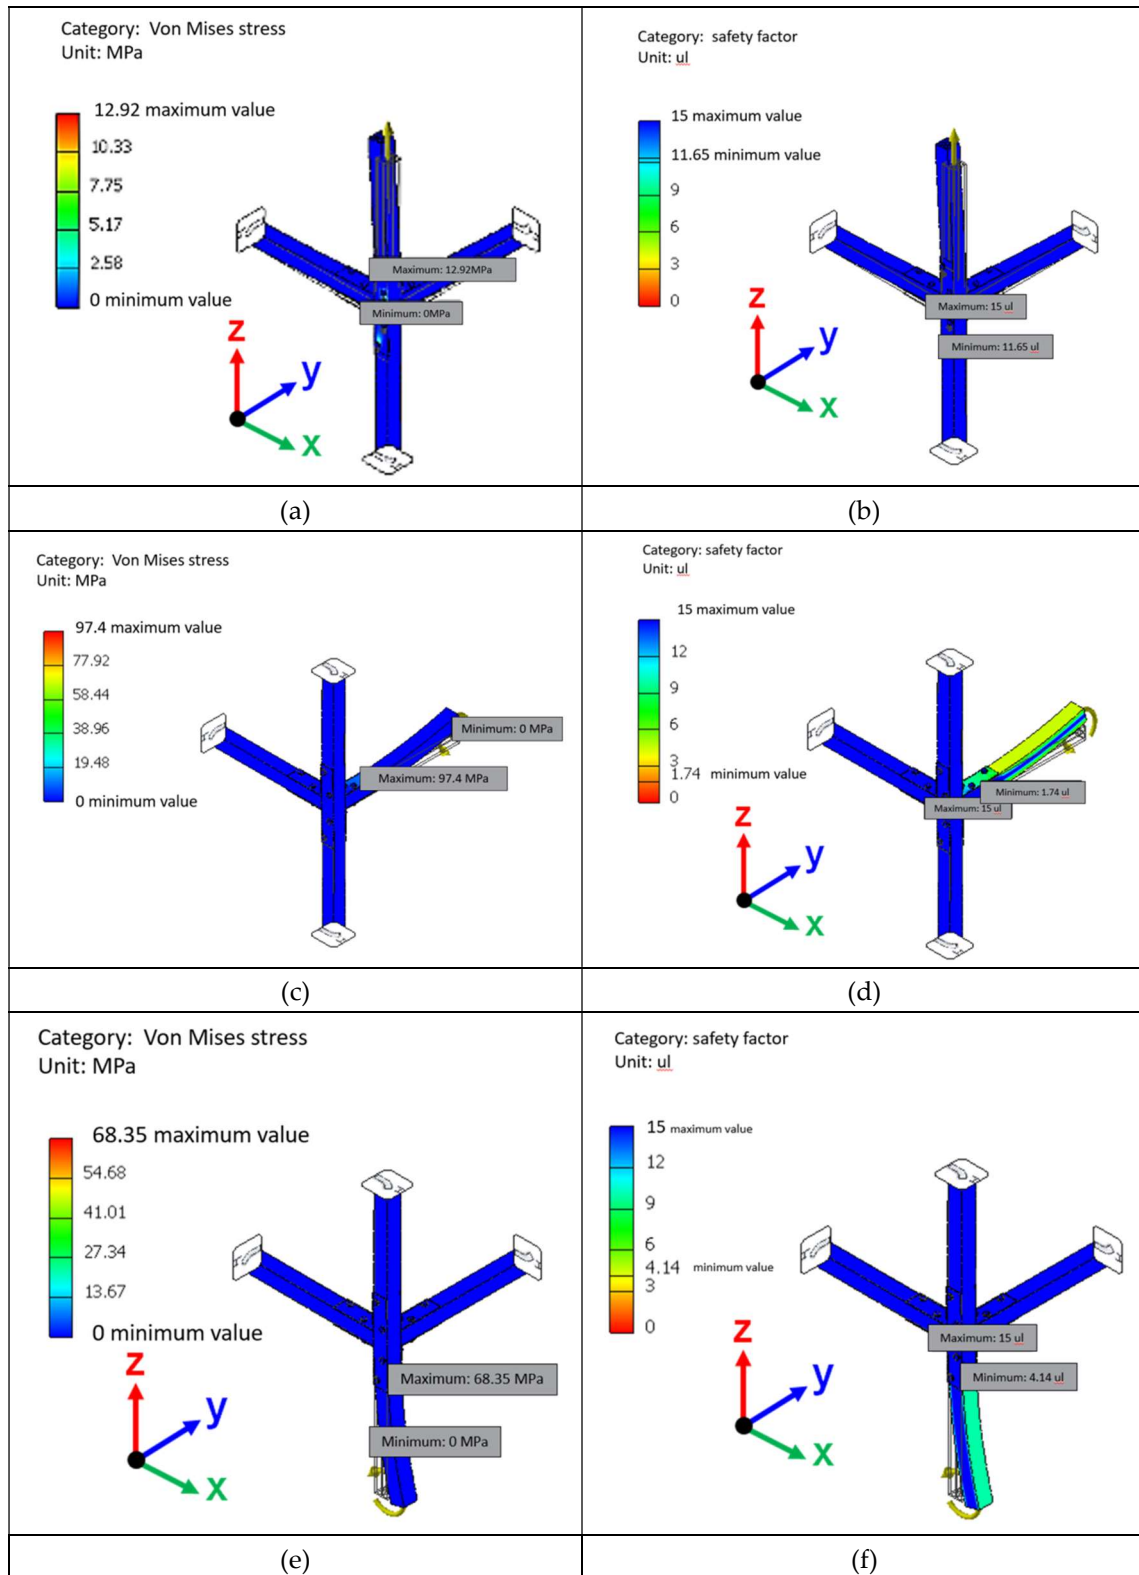

**Figure S10.** Fastener H (a) von Mises stress and (b) safety factor under axial tension (c) von Mises stress and (d) safety factor under X-axis bending moment (e) von Mises stress and (f) safety factor under Y-axis bending moment

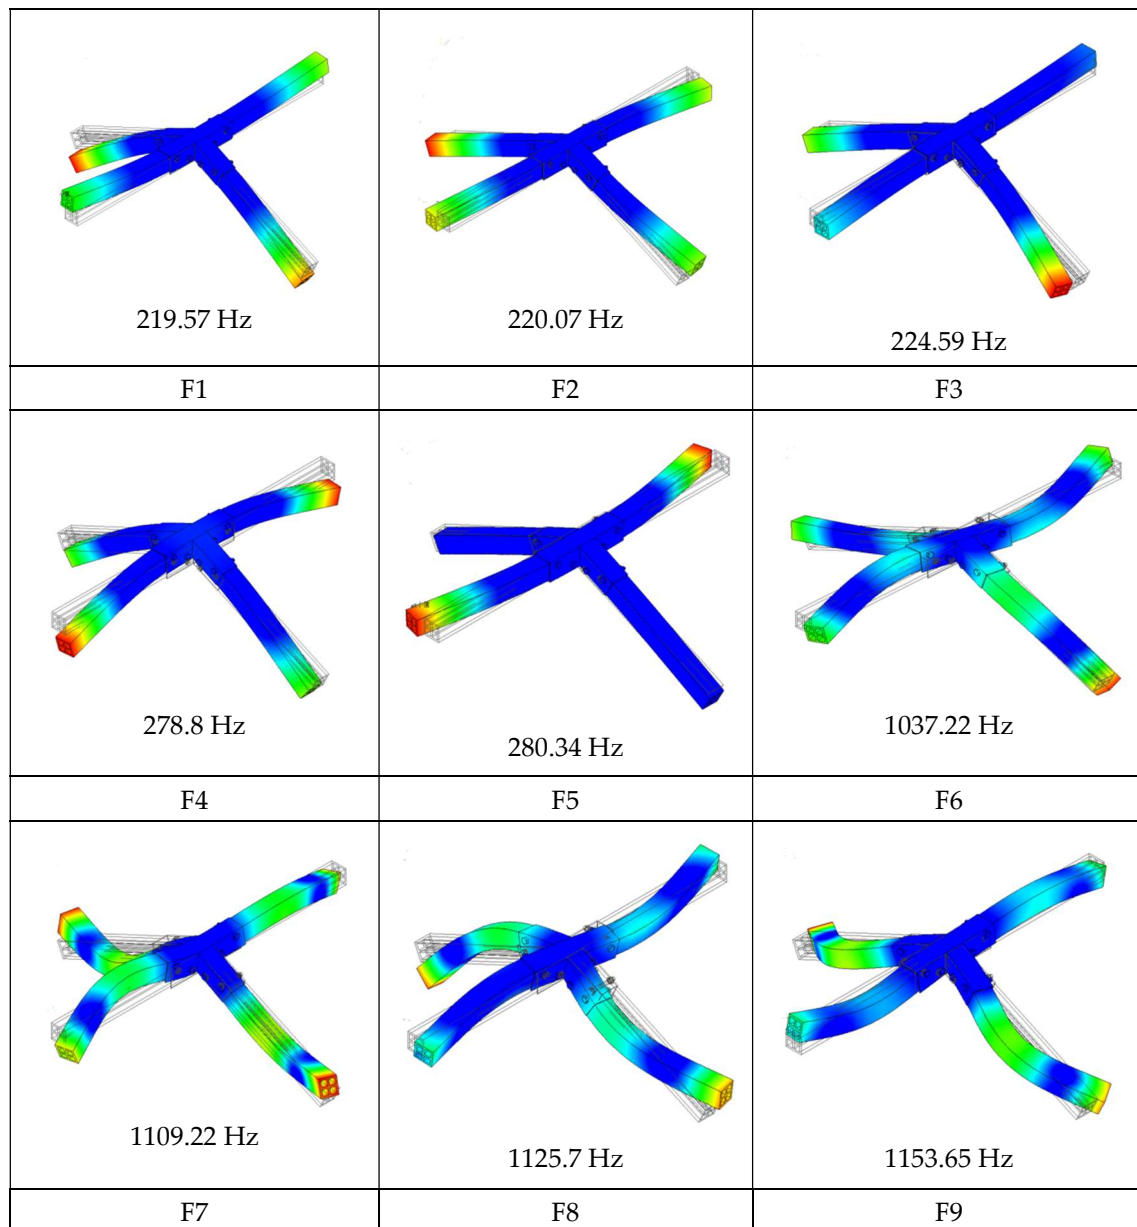

**Figure S11.** The resonant frequencies and corresponding mode shapes in Fastener A

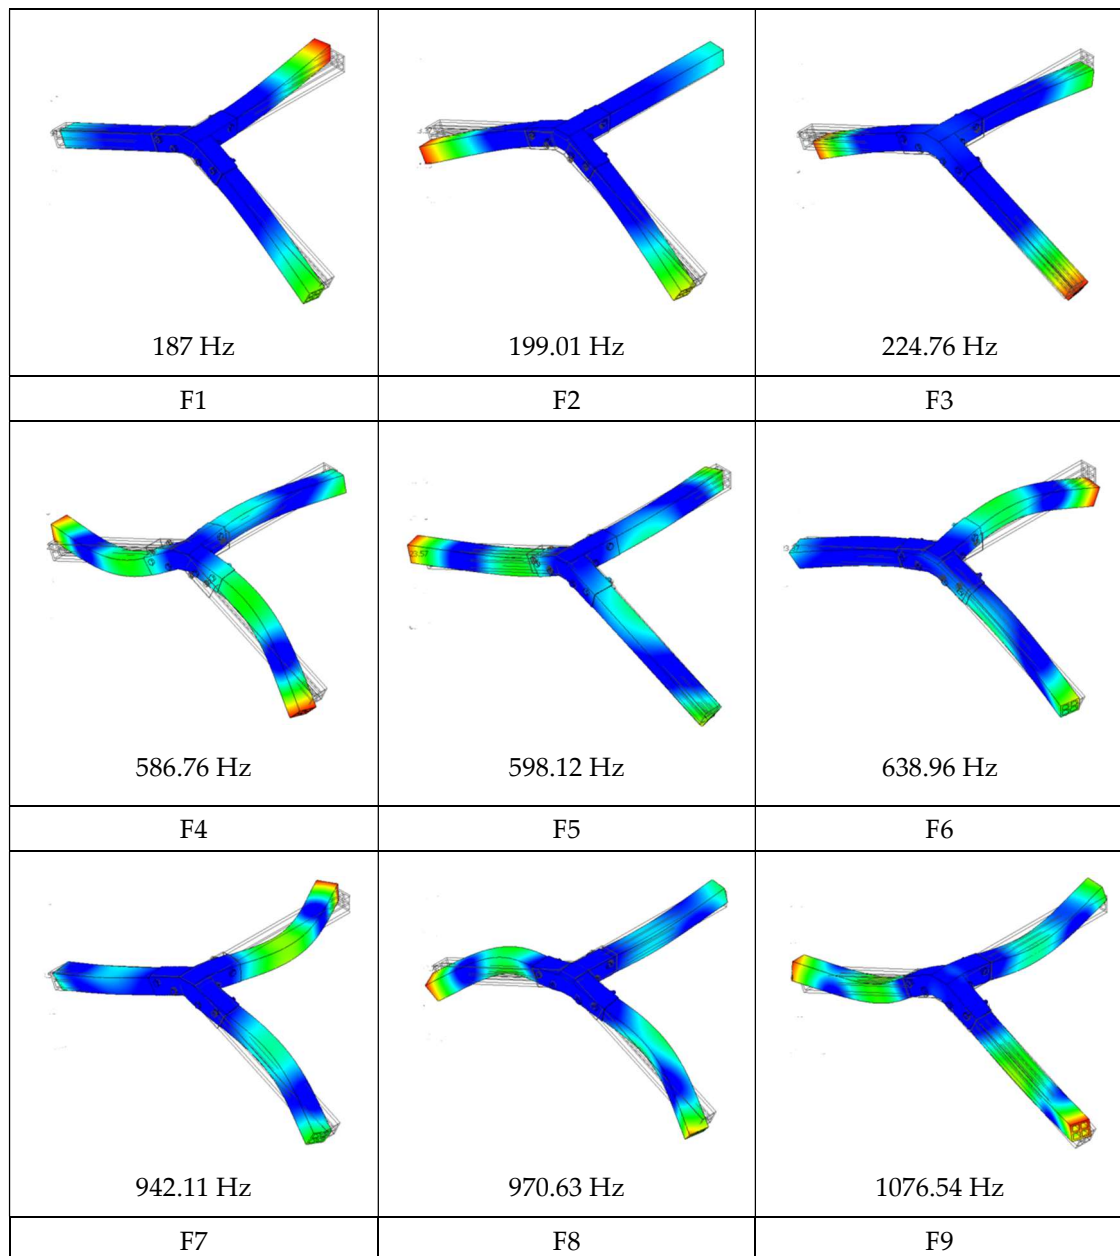

**Figure S12.** The resonant frequencies and corresponding mode shapes in Fastener B

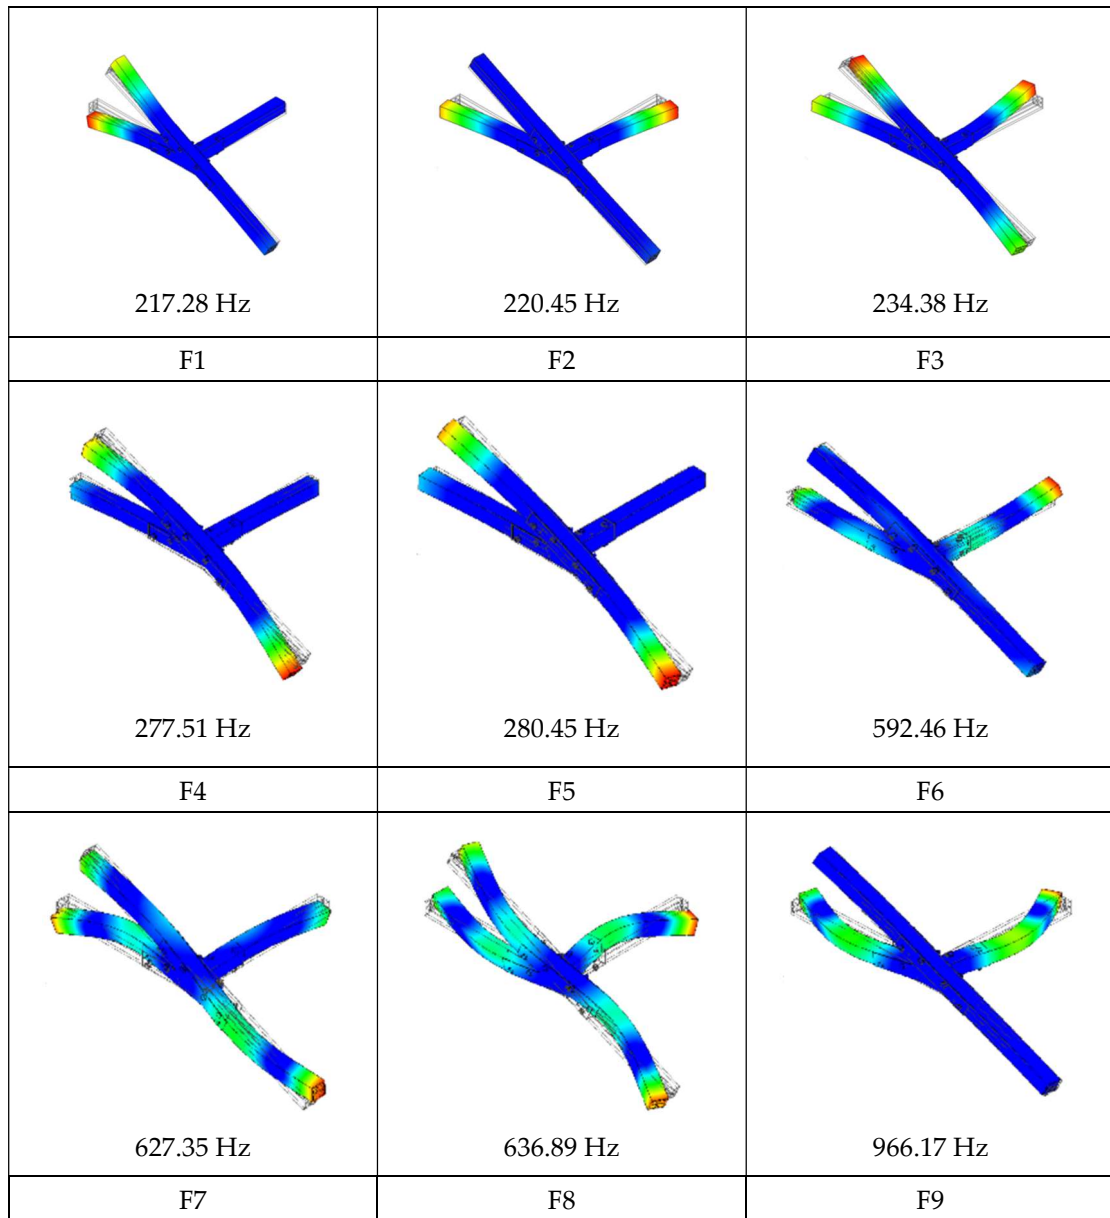

**Figure S13.** The resonant frequencies and corresponding mode shapes in Fastener C



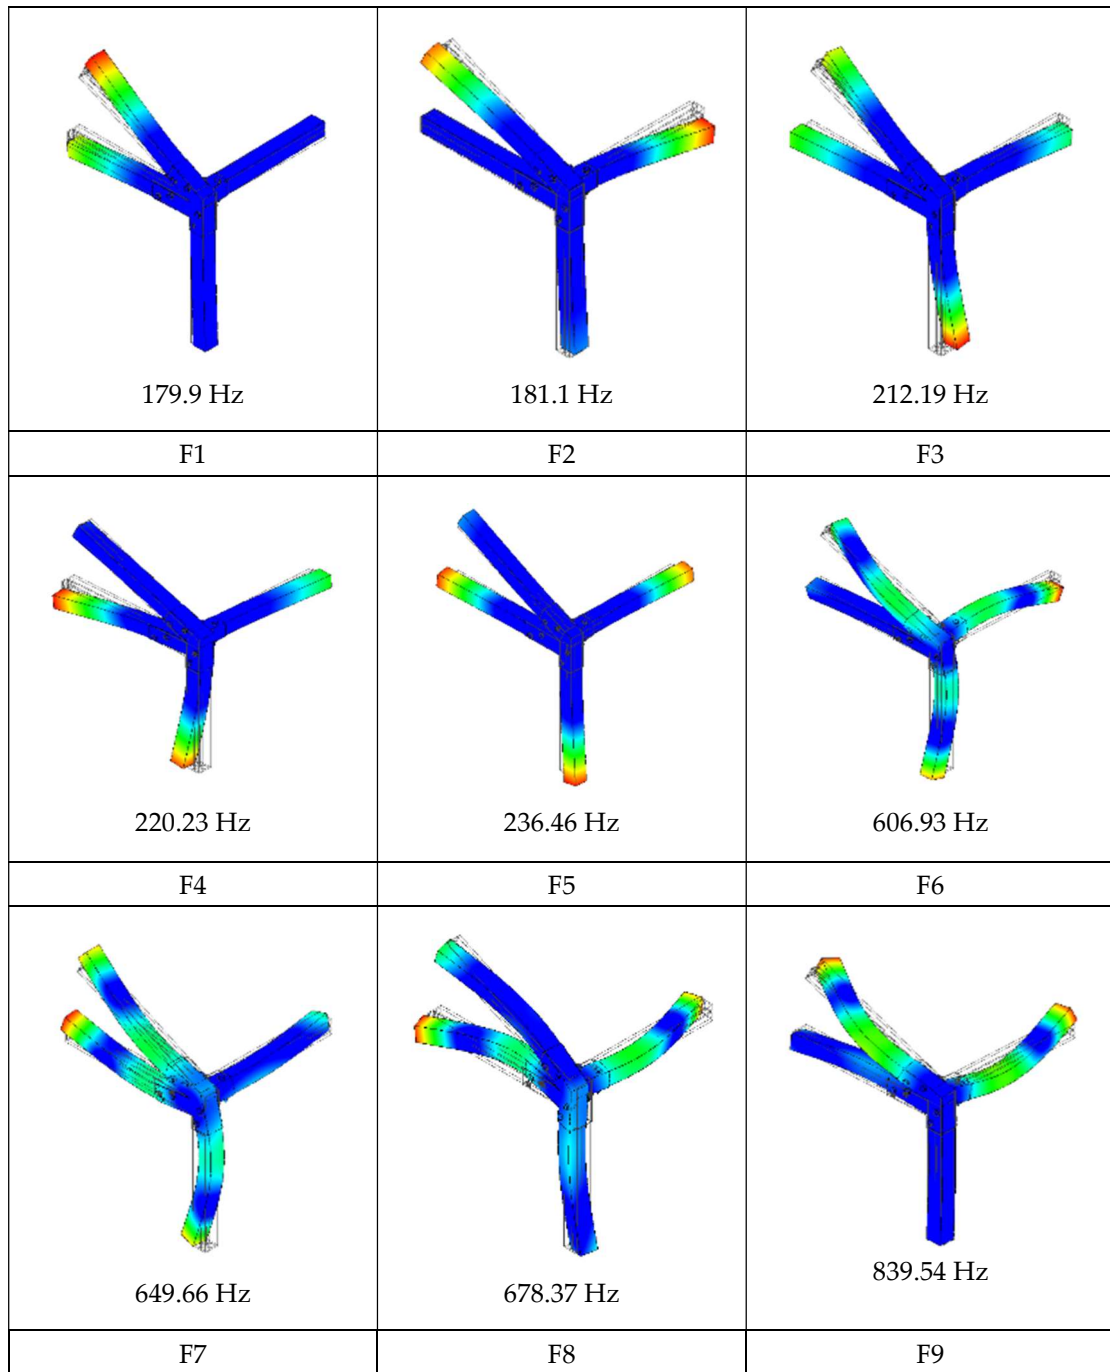

**Figure S14.** The resonant frequencies and corresponding mode shapes in Fastener D

|                                                                                                  |                                                                                                 |                                                                                                    |
|--------------------------------------------------------------------------------------------------|-------------------------------------------------------------------------------------------------|----------------------------------------------------------------------------------------------------|
| 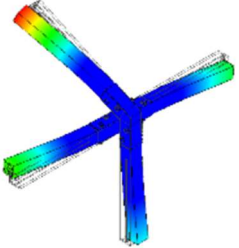<br>194.82 Hz   | <br>196.17 Hz  | <br>223.53 Hz   |
| F1                                                                                               | F2                                                                                              | F3                                                                                                 |
| <br>249.13 Hz   | <br>261.19 Hz  | <br>655.45 Hz   |
| F4                                                                                               | F5                                                                                              | F6                                                                                                 |
| <br>671.46 Hz | <br>716.4 Hz | <br>923.45 Hz |
| F7                                                                                               | F8                                                                                              | F9                                                                                                 |

**Figure S15.** The resonant frequencies and corresponding mode shapes in Fastener E

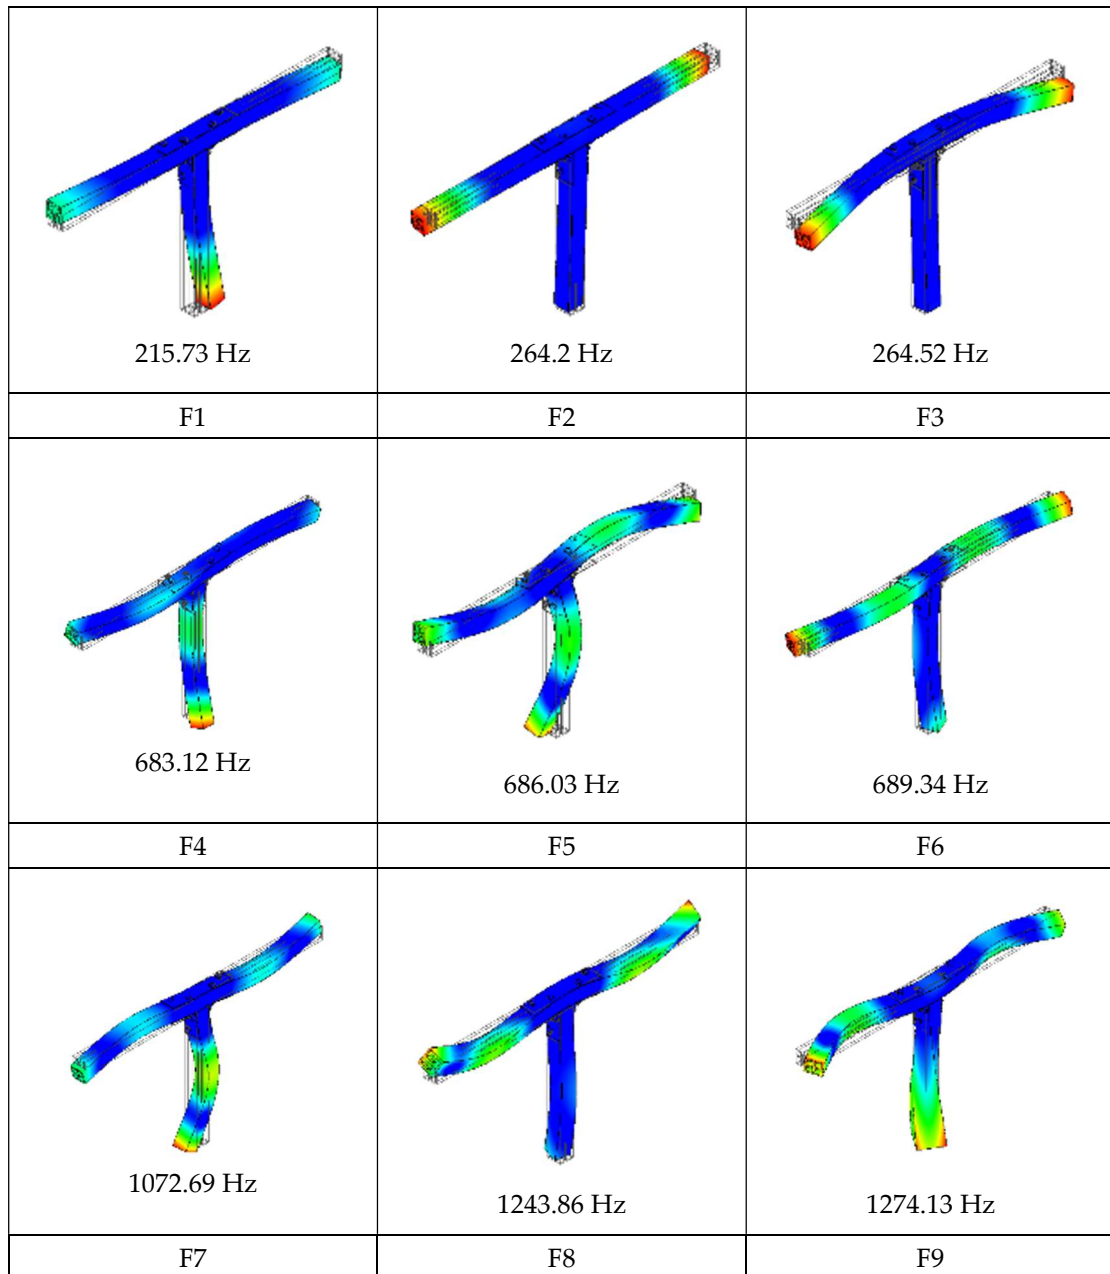

**Figure S16.** The resonant frequencies and corresponding mode shapes in Fastener F

|                                                                                                  |                                                                                                  |                                                                                                     |
|--------------------------------------------------------------------------------------------------|--------------------------------------------------------------------------------------------------|-----------------------------------------------------------------------------------------------------|
| 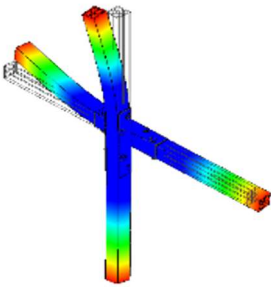<br>214.64 Hz   | <br>216.31 Hz   | <br>253.71 Hz    |
| F1                                                                                               | F2                                                                                               | F3                                                                                                  |
| <br>257.22 Hz   | <br>272.97 Hz   | <br>692.2 Hz     |
| F4                                                                                               | F5                                                                                               | F6                                                                                                  |
| <br>705.02 Hz | <br>705.42 Hz | <br>1056.12 Hz |
| F7                                                                                               | F8                                                                                               | F9                                                                                                  |

**Figure S17.** The resonant frequencies and corresponding mode shapes in Fastener G1

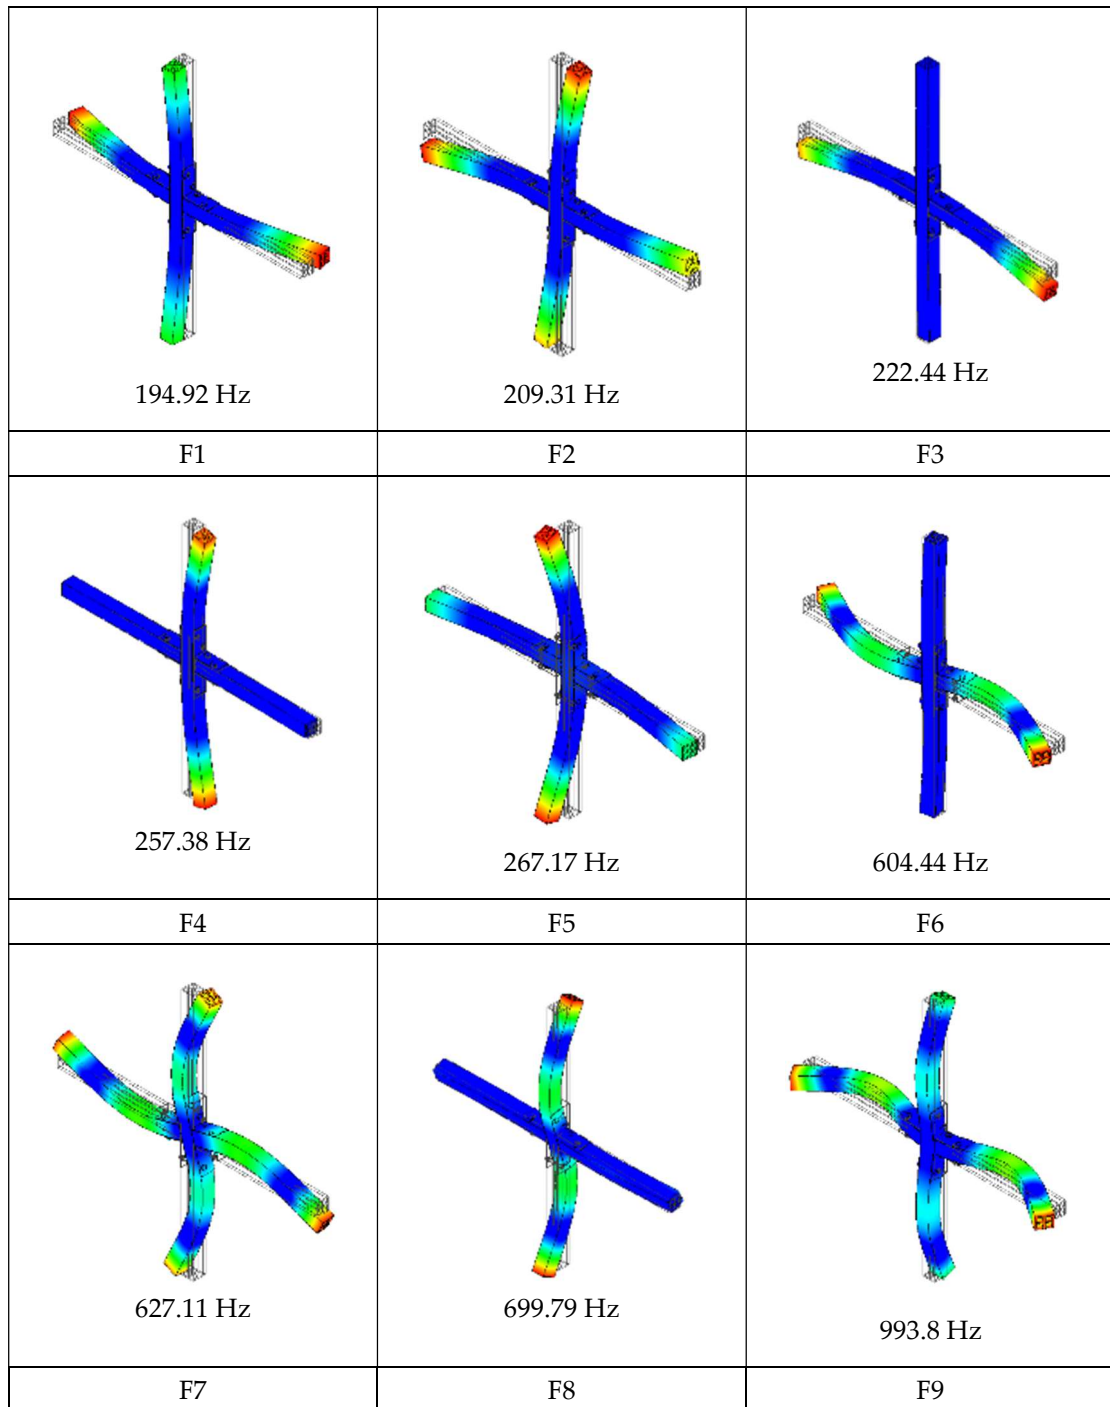

**Figure S18.** The resonant frequencies and corresponding mode shapes in Fastener G2

|                                                                                                        |                                                                                                        |                                                                                                           |
|--------------------------------------------------------------------------------------------------------|--------------------------------------------------------------------------------------------------------|-----------------------------------------------------------------------------------------------------------|
| 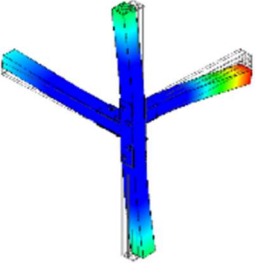<br>202.84 Hz<br>F1   | <br>204.81 Hz<br>F2   | <br>222.58 Hz<br>F3    |
| <br>249.18 Hz<br>F4   | <br>264.43 Hz<br>F5   | <br>659.33 Hz<br>F6    |
| <br>662.78 Hz<br>F7 | <br>679.57 Hz<br>F8 | <br>1005.71 Hz<br>F9 |

**Figure S19.** The resonant frequencies and corresponding mode shapes in Fastener H
